# Supplementary material for: Opposite metabolic responses of shoots and roots to drought
Source: PubMed Central journal article supplement — Sci Rep. 2014 Oct 29;4:6829. doi: 10.1038/srep06829 (PMC4212232; doi:10.1038/srep06829), 2014-10-29
Supplement: srep06829-s1.pdf [file srep06829-s1.pdf]

# 1 Opposite metabolic responses of shoots and roots to 2 drought

3 Albert Gargallo-Garriga<sup>1,2,3\*</sup>, Jordi Sardans<sup>1,2</sup>, Míriam Pérez-Trujillo<sup>3</sup>, Albert Rivas-Ubach<sup>1,2</sup>,  
4 Michal Oravec<sup>4</sup>, Kristyna Vecerova<sup>4</sup>, Otmar Urban<sup>4</sup>, Anke Jentsch<sup>5</sup>, Juergen Kreyling<sup>6</sup>, Carl  
5 Beierkuhnlein<sup>6</sup>, Teodor Parella<sup>3</sup>, Josep Peñuelas<sup>1,2</sup>.

6

## 7 Supplementary material

### 8 Material & Methods

#### 9 Study site

10 Sampling was part of the EVENT II experiment<sup>34</sup>, where precipitation patterns were  
11 experimentally modified in a semi-natural, extensively managed grassland in the Ecological-  
12 Botanical Garden of the University of Bayreuth, Germany (49°55'19" N, 11°34'55" E, 365 m  
13 a.s.l.). The climate is characterised as temperate and moderately continental with a mean annual  
14 air temperature of 8.2 °C and 724 mm of mean annual precipitation (1971-2000, data from the  
15 German Weather Service). The soil in the experiment is classified as a Gleysol. The  
16 homogeneous, loamy Ap horizon (42% sand, 43% silt, and 15% clay) has a depth of 30 cm,  
17 followed by a clayey Bg horizon. The water table drops to -1.5 to -2 m in summer and can reach  
18 -30 cm in winter and after longer periods of rain. The main rooting zone is within the upper 15  
19 cm, and few roots penetrate the Bg horizon. The mean pH of the topsoil is 4.1 (1 M KCl). The  
20 volumetric soil moisture content for the permanent wilting point is near 15% and that for field  
21 capacity is near 40%. The experimental site is a semi-natural grassland that has neither been  
22 ploughed nor fertilised for at least 20 years prior to the installation of the EVENT II experiment  
23 in 2008. The meadow was mown twice a year for hay production prior to the start of the  
24 experiment. The semi-natural grassland community is dominated by tall grasses such as  
25 *Alopecurus pratensis* L. (meadow foxtail) and *Arrhenatherum elatius* (L.) P. Beauv. ex J. Presl  
26 & C. Presl (tall oat-grass) and harbours on average 16 species per m<sup>2</sup>. All species are C3 plants.

27

28

29 Experimental design

30 The field experiment had a two-factorial design manipulating (1) variability of intra-annual  
31 precipitation (low, medium, and high, the latter including an extreme drought) and (2) warming  
32 (ambient, winter warming, and summer warming). The design consisted of 45 plots, each 1.5 ×  
33 1.5 m in size, with five replications of all factorial combinations. The warmed and unwarmed  
34 plots were blocked and randomly assigned within each manipulation of the precipitation.

35 The annual precipitation was kept constant since 2009, while the temporal pattern of  
36 precipitation in time was altered during the growing season (April-September). Three  
37 precipitation treatments, irrigated control, ambient control, and drought were established. The  
38 plots in the **irrigated control** treatment received at least the long-term (1971-2000) average  
39 weekly precipitation per week. The plots were exposed to ambient rainfall, but if the weekly  
40 rainfall was less than the long-term average, the deficit was added by irrigation. If the weekly  
41 ambient rainfall exceeded the long-term average, the excess was not subtracted for the next  
42 irrigation. The amount of precipitation in this treatment served as the reference amount for all  
43 other treatments. The plots in the **ambient control** treatment received ambient levels of  
44 precipitation plus four irrigations (before and after drought, six weeks after drought, and in late  
45 September near the end of the growing season) to compensate for the differences with the  
46 irrigated control treatment at those four times. The drought treatment also received these  
47 additions of water, so all three treatments received the same annual amount of precipitation.  
48 Rain was excluded from the plots of the **drought** treatment to simulate the local 1000-year  
49 recurrence of drought calculated by Gumbel statistics based on the 1961-2000 time series  
50 recorded at a local weather station. Drought was defined by the number of consecutive days  
51 with <1 mm daily precipitation and was simulated by the exclusion of natural rainfall for 42  
52 days using rain-out shelters. The shelters had steel frames (Hochtunnel, E & R Stolte GmbH,  
53 Germany) and were covered with transparent plastic sheets (0.2 mm polyethylene, SPR 5,  
54 Hermann Meyer KG, Germany) during the period of simulated drought that permitted nearly 90%  
55 penetration of photosynthetically active radiation, based on tests prior to set-up. An 80-cm gap  
56 was left between the ground and the plastic sheets to allow air exchange near the surface, which  
57 reduced microclimatic artefacts such as increased temperatures or reduced wind speed. The  
58 amount of excluded rain was applied together with the adjustment to the irrigated control  
59 treatment at the end of the period of artificial drought as one heavy episode of rain within two  
60 days.

61 The warming manipulations were performed either during the winter (October-March) or the  
62 summer (April-September) starting in October 2009. Temperatures were increased using infra-  
63 red overhead heating lamps equipped with reflector domes (IOT/90 250W Elstein, Northeim,

64 Germany) at a height of 0.8 m, theoretically providing 60 W/plot. The lamps were raised to 1 m  
65 when tall grasses reached 80 cm. Unwarmed plots were equipped with dummy heaters. The air  
66 temperature at 5 cm above the ground was raised on average by 0.9 °C in winter and by 1.3 °C  
67 in summer. Note that the focus of the study was the effect of drought, not of warming.

#### 68 Target species

69 Two C3 grasses were selected as target species for this study: *A. pratensis* L. and *Holcus*  
70 *lanatus* L. Both species were selected based on their high frequency in the experimental plots  
71 and their importance in semi-natural grasslands across central Europe. *A. pratensis* is the  
72 dominant species at the experimental site, producing about 18% of the annual aboveground  
73 biomass. It is a tall (up to 110 cm) and productive species of agricultural importance in moist  
74 and nutrient-rich meadows. *H. lanatus* is also frequent at the site, but less productive (3% share  
75 of the annual aboveground biomass). It occurs in semi-natural grasslands throughout Europe,  
76 Asia, and North Africa and is invasive in North America and Australia. It tolerates a wide range  
77 of conditions but prefers moist meadows.

78

79

#### 80 Collection and preparation of the tissue samples

81 Samples were collected at the end of the drought manipulation before irrigation in July and  
82 again at the end of the growing season in September. Above- and belowground tissues were  
83 sampled from each of the 45 plots (3 precipitation treatments × 3 warming treatments × 5  
84 replicates). We collected a total of 347 samples. In July we collected 44 samples of leaf blades  
85 and 43 samples of fine roots of *H. lanatus* and 45 samples of leaf blades and 44 samples of fine  
86 roots of *A. pratensis*. In September we collected 42 samples of leaf blades and 41 samples of  
87 fine roots of *H. lanatus* and 45 samples of leaf blades and 44 samples of fine roots of *A.*  
88 *pratensis*. The samples were roughly cleaned and immediately frozen in liquid nitrogen. The  
89 procedure for sample preparation is described in detail by Rivas-Ubach et al. (2013)<sup>35</sup>. Briefly,  
90 the frozen samples were lyophilised and stored in plastic cans at -80 °C. Soil contamination was  
91 removed from the root samples. Finally, the samples were ground with a ball mill  
92 (Mikrodismembrator-U, B. Braun Biotech International, Melsungen, Germany) at 1700 rpm for  
93 4 min, producing a fine powder that was stored at -80 °C until the extraction of the metabolites.

#### 94 Elemental analysis

95 For the analysis of C and N, 1.5 mg of each powdered sample was analysed, and their  
96 concentrations were determined by combustion coupled to gas chromatography using a CHNS-  
97 O Elemental Analyser (EuroVector, Milan, Italy).

98 P, K, Fe, Mn, Mg, Ca, and S were analysed by extraction by acid digestion in a microwave  
99 reaction system under high pressure and temperature. Briefly, 250 mg of leaf powder were  
100 placed in a Teflon tube with 5 mL of nitric acid and 2 mL of H<sub>2</sub>O<sub>2</sub>. A MARSX press microwave  
101 reaction system (CEM, Mattheus, USA) was used for these acid digestions. The digested  
102 material was transferred to 50-ml flasks and resuspended in Milli-Q water to a final volume of  
103 50 mL. The element concentrations were determined by ICP-OES (Optic Emission  
104 Spectrometry with Inductively Coupled Plasma) (Perkin-Elmer Corporation, Norwalk, USA).

#### 105 Extraction of metabolites

106 Two sets of 50-mL centrifuge tubes were labelled as set A for liquid chromatography-mass  
107 spectrometry (LC-MS) analysis and set B for nuclear magnetic resonance (NMR) analysis. Each  
108 tube of set A received 150 mg of a powdered sample then 6 mL of water/methanol (1/1), and the  
109 samples were vortexed for 15 s and then sonicated for 2 min at room temperature. All tubes  
110 were centrifuged at 1100 × g for 15 min. Next, 4 mL of each tube of set A were transferred to its  
111 corresponding tube of set B. This procedure was repeated twice for two extractions of the same  
112 sample. The resulting extracts were used for metabolomic analysis.

#### 113 Preparation of extracts for NMR analysis

114 Eight millilitres of the extracts were resuspended in water to reduce the proportion of methanol  
115 (<15% methanol). The solutions were lyophilised, and 4 mL of water were added to each tube,  
116 which was vortexed and centrifuged at 23 000 × g for 3 min. The samples were frozen at -80 °C  
117 and lyophilised again. Finally, 1 mL of KD<sub>2</sub>PO<sub>4</sub>-buffered D<sub>2</sub>O solution containing 0.01% TSP  
118 (trimethylsilyl propionic acid sodium salt) (pH 6.0) was added to each dried fraction. TSP was  
119 used as the internal standard for the NMR experiments. The solutions were transferred to 2-mL  
120 centrifuge tubes with a micropipette and centrifuged at 23 000 × g for 3 min, and 0.6 mL of the  
121 supernatants were transferred to NMR sample tubes.

122 The procedure for the extraction of metabolites is described in detail by Rivas-Ubach et al.<sup>35</sup>.

#### 123 Preparation of extracts for LC-MS analysis

124 Two millilitres of the supernatants of each tube of set A were collected using crystal syringes,  
125 filtered through 0.22 µm microfilters, and transferred to a labelled set of LC vials. The vials  
126 were stored at -80 °C until the LC-MS analysis.

#### 127 LC-MS analysis

128 LC-MS chromatograms were obtained with a Dionex Ultimate 3000 HPLC system (Thermo  
129 Fisher Scientific/Dionex RSLC, Dionex, Waltham, Massachusetts, USA) coupled to an LTQ

130 Orbitrap XL high-resolution mass spectrometer (Thermo Fisher Scientific, Waltham,  
131 Massachusetts, USA) equipped with an HESI II (heated electrospray ionisation) source.  
132 Chromatography was performed on a reversed-phase C18 Hypersil gold column (150 × 2.1 mm,  
133 3- $\mu$  particle size; Thermo Scientific, Waltham, Massachusetts, USA) at 30 °C. The mobile  
134 phases consisted of acetonitrile (A) and water (0.1% acetic acid) (B). Both mobile phases were  
135 filtered and degassed for 10 min in an ultrasonic bath prior to use. The elution gradient, at a  
136 flow rate of 0.3 mL per minute, began at 10% A (90% B) and was maintained for 5 min, then to  
137 10% B (90% A) for the next 20 min. The initial proportions (10% A and 90% B) were gradually  
138 recovered over the next 5 min, and the column was then washed and stabilised for 5 min before  
139 the next sample was injected. The injection volume of the samples was 5  $\mu$ L. HESI was used for  
140 MS detection. All samples were injected twice, once with the ESI operating in negative  
141 ionisation mode (-H) and once in positive ionisation mode (+H). The Orbitrap mass  
142 spectrometer was operated in FTMS (Fourier Transform Mass Spectrometry) full-scan mode  
143 with a mass range of 50-1000 m/z and high-mass resolution (60 000). The resolution and  
144 sensitivity of the spectrometer were monitored by injecting a standard of caffeine after every 10  
145 samples, and the resolution was further monitored with lock masses (phthalates). Blank samples  
146 were also analysed during the sequence. The assignment of the metabolites was based on the  
147 standards, with the retention time and mass of the assigned metabolites in both positive and  
148 negative ionisation modes.

#### 149 NMR analysis

150 See the main text for the description of the NMR analysis.  $^1\text{H}$  NMR-based fingerprints were  
151 obtained for all samples. One-dimensional (1D)  $^1\text{H}$  NMR spectra were acquired with  
152 suppression of the residual water resonance. The water-resonance signal was presaturated using  
153 a power level of 55 dB during a relaxation delay of 2 s. Each spectrum acquired 32 k data points  
154 over a spectral width of 16 ppm as the sum of 128 transients and with an acquisition time of 1.7  
155 s. The total acquisition time was ~8 min per sample with a relaxation delay of 2s. All  $^1\text{H}$  NMR  
156 spectra were phased and baselines were corrected and referenced to the resonance of the internal  
157 standard (TSP) at  $\delta$  0.00 ppm using TOPSPIN 3.1. See Rivas-Ubach et al. (2013)<sup>35</sup> for more  
158 details of the sampling and NMR determination. The data were subsequently used for the  
159 statistical analysis. A variable-size bucketing was applied to all  $^1\text{H}$  NMR spectra with AMIX  
160 software (Bruker Biospin, Rheinstetten, Germany), scaling the buckets relative to the internal  
161 standard (TSP). The output was a data set containing the integral values for each assigned  $^1\text{H}$   
162 NMR spectral peak in the described pattern. The buckets corresponding to the same molecular  
163 compound were summed.

164 The NMR spectrometer described for the fingerprinting was used for the acquisition of the 2D  
165 NMR on selected representative samples. The probe temperature was set to 298.0 K, and  
166 TopSpin 2.1 (Bruker BioSpin) acquired and processed the experiments. The data for 1D  $^1\text{H}$   
167 NMR, 2D  $^1\text{H}$ - $^1\text{H}$  correlation spectroscopy (COSY),  $^1\text{H}$ - $^1\text{H}$  total correlation spectroscopy  
168 (TOCSY),  $^1\text{H}$ - $^{13}\text{C}$  heteronuclear single-quantum correlation (HSQC), and  $^1\text{H}$ - $^{13}\text{C}$  heteronuclear  
169 multiple-bond correlation (HMBC) were acquired using standard Bruker pulse sequences and  
170 routine conditions<sup>35</sup>.

171 Statistical analyses

172 To test for differences in plant elemental stoichiometries and metabolomes between seasons and  
173 drought treatments, we conducted a PERMANOVA analysis of the LC-MS and NMR  
174 metabolomic fingerprints from *H. lanatus* and *A. pratensis* using Euclidean distances, with  
175 season (September and July), climatic treatment (ambient control, irrigated control, and  
176 drought), and organ as fixed factors. The number of permutations was set at 999. The  
177 PERMANOVA as well as PLS (partial least squares) analysis, and CIM (clustered image maps)  
178 conducted with R (R Development Core Team 2008).

179 The plant stoichiometric and metabolomic fingerprints were also subjected to principal  
180 component analysis (PCA) to understand how the stoichiometries and metabolomes of *H.*  
181 *lanatus* and *A. pratensis* shifted with the factors studied (organ, season, and climatic treatment).  
182 Fingerprints from leaves and roots for July and September were additionally submitted to  
183 separate PCAs (Fig. 2). The PCAs were performed by the *pca* function of the *mixOmics*  
184 package of R (R Development Core Team 2008). The score coordinates of the variables were  
185 subjected to one-way ANOVAs to find statistical differences among groups (see Supporting  
186 Information in Rivas-Ubach et al. (2013)). A Kolmogorov-Smirnov (KS) test was performed on  
187 each variable to test for normality. All assigned and identified metabolites were normally  
188 distributed, and any unidentified metabolomic variable that was not normally distributed was  
189 removed from the data set. Statistica v8.0 (StatSoft) was used to perform ANOVAs, post-hoc  
190 tests, and KS tests.

191

192

193

194

195

196

197

198

199 **Figure caption**

200 **Figure S1.** Plot of cases and variables in the PCAs conducted with the elemental, stoichiometric,  
201 and metabolomic variables in plants sampled in September. (A) Plot of cases and variables of  
202 shoots. (B) Plot of cases and variables of roots. C/N/P/K ratios are shown in red. The various  
203 metabolomic families are represented by colours: blue, sugars; green, amino acids; dark-green,  
204 amino-acid derivatives; yellow, related compounds to amino acid and sugar metabolism ; cyan,  
205 nucleotides; violet, osmolytes; and brown, terpenes and phenols. Metabolites: acacetin (Acace),  
206 adenine (Adenine), alanine (Ala), arginine (Arg), ascorbic acid (Asco), asparagine (Asn),  
207 aspartic acid (Asp), caffeic acid (Caff), catechin (Cate), chinic acid (Cin.acid), chlorogenic acid  
208 (CGA), choline (Choline), citric acid (Cit), disaccharide (Disac), galangin (Galangin), gamma-  
209 aminobutyric acid (GABA), glutamic acid (Glu), glutamine (Gln), glycine (Gly), glycine  
210 betaine (GB), glycine-alanine (Gly-Ala), hexose (Hexose), histidine (His), indol acetic acid  
211 (IAA), isoleucine (Ile), jasmonic acid (JA), kaempferol (Kaemp), lactic acid (Lac), leucine  
212 (Leu), limonene (Limonene), lysine (Lys), malic acid (Mal) mannose (Man), ocimene  
213 (Ocimene), phenolic group (Phenol), phenylalanine (Phe), proline (Pro), pyruvate (Pyr),  
214 quercetin (Quer), quinic acid (QA), resveratrol (Resv), sabinene (Sabinene), serine (Ser),  
215 shikimic acid (SA), tartaric acid (Tar), threonine (Thr), thymine (Thymine), tryptophan (Try).  
216 The means of cases are indicated by: blue, irrigated control; green, ambient control; and orange,  
217 drought. *Holcus lanatus* is indicated as *Holcus* and *Alopecurus pratensis* as *Alopecurus*.

218 **Figure S2.** Loading of elemental stoichiometric and metabolomic variables in the PC axes  
219 separating drought treatments (Fig. S1). Variables are coloured and labelled as described in the  
220 caption for Fig. 1. Asterisks showed statistical significance ( $P < 0.05$ ) in one-way ANOVAs.  
221 The drawing is a reproduction of the painting by C. A. M. Lindman.

222 **Figure S3.** Clustered image maps of the metabolites of shoots in the different treatments. Based  
223 on the data of the PLS analysis. The red and blue colours indicate positive and negative  
224 correlations respectively.

225

226 **Figure S4.** Clustered image maps of the metabolites of roots in the different treatments. Based  
227 on the data of the PLS analysis. The red and blue colours indicate positive and negative  
228 correlations respectively.

229

230

231

232

233

234

235

236

238 **Table S1-S4.** One-way ANOVAs of all elemental stoichiometric and metabolomic variables for  
239 *Holcus lanatus* and *Alopecurus pratensis* for shoots and roots. For the NMR variables, marked  
240 by inverted commas (‘), integral mean value (mM) respect initial TSP (0.01%). For the LC-MS  
241 variables, marked by asterisks (\*), integral mean value of deconvoluted total intensities. The  
242 statistically significant differences between treatments detected by Tukey’s HSD post-hoc tests  
243 are indicated by letters ( $P < 0.05$ ) and bold type colour. Elemental stoichiometric C, N, P, and K  
244 concentrations and ratios and Fe, Mn, Mg, Ca, and S concentrations are shown in red. The  
245 various metabolomic families are represented by colours: dark blue, sugars; green, amino acids;  
246 dark green, amino-acid derivatives; yellow, related compounds to the metabolism of amino  
247 acids and sugars; cyan, nucleotides; and brown, terpenes and phenolics. Metabolites: acetin  
248 (Acace), adenine (Adenine), alanine (Ala), arginine (Arg), ascorbic acid (Asco), asparagine  
249 (Asn), aspartic acid (Asp), caffeic acid (Caff), catechin (Cate), chinic acid (Cin.acid),  
250 chlorogenic acid (CGA), choline (Choline), citric acid (Cit), disaccharide (Disac), galangin  
251 (Galangin), gamma-aminobutyric acid (GABA), glutamic acid (Glu), glutamine (Gln), glycine  
252 (Gly), glycine betaine (GB), glycine-alanine (Gly-Ala), hexose (Hexose), histidine (Hys), indol  
253 acetic acid (Indol.acetic), isoleucine (Ile), jasmonic acid (JA), kaempferol (Kamp), lactic acid  
254 (Lac), leucine (Leu), limonene (Limonene), lysine (Lys), malic acid (Mal) mannose (Man),  
255 ocimene (Ocimene), phenolic group (Phenol), phenylalanine (Phe), proline (Pro), pyruvate (Pyr),  
256 quercetin (Quer), quinic acid (QA), resveratrol (Resv), sabinene (Sabinene), serine (Ser),  
257 shikimic acid (SA), tartaric acid (Tar), threonine (Thr), thymine (Thymine), tryptophan (Try).  
258 The means of cases are indicated by: blue, irrigated control; green, ambient control; and orange,  
259 drought. *Holcus lanatus* is indicated as *Holcus* and *Alopecurus pratensis* as *Alopecurus*. IC,  
260 irrigated control; AC, ambient control; D, drought; SE, standard error.

261

262

263

264

265

266

267

268

269

270

271

272

273



A

# SHOOTS

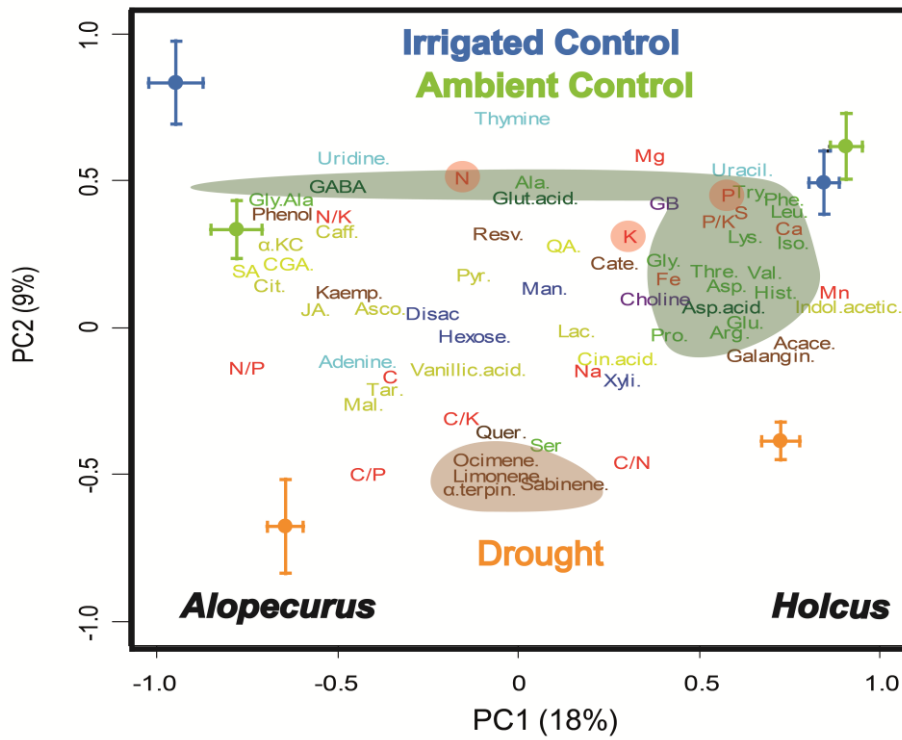

B

# ROOTS

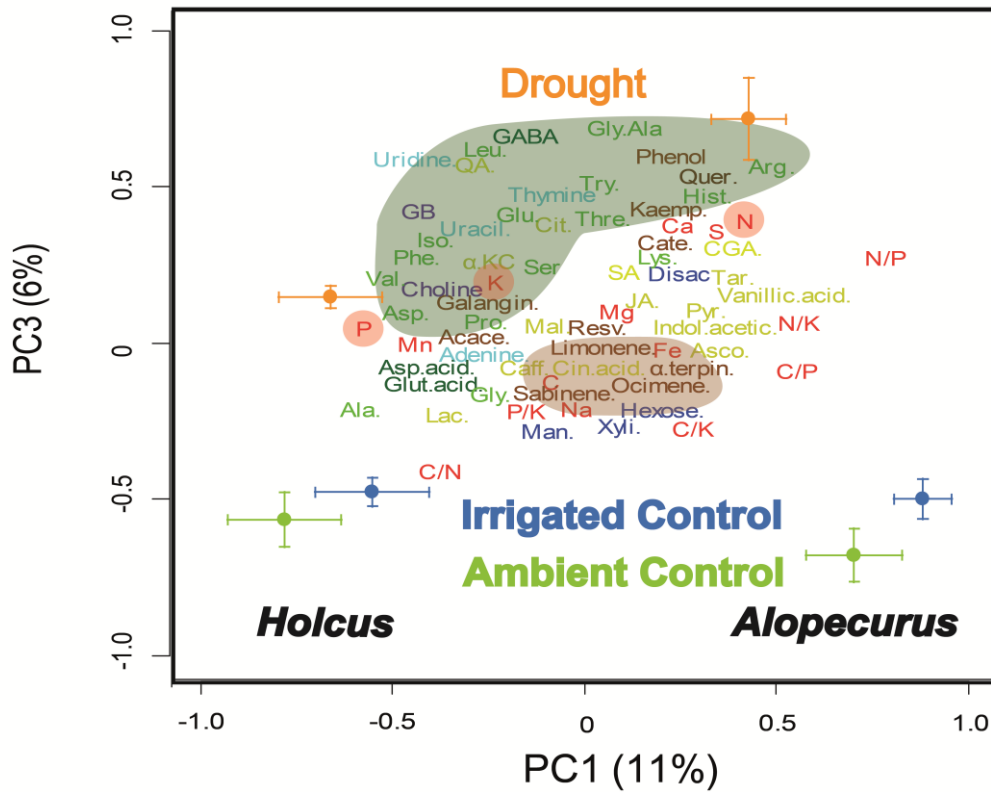

277 **Figure S2**

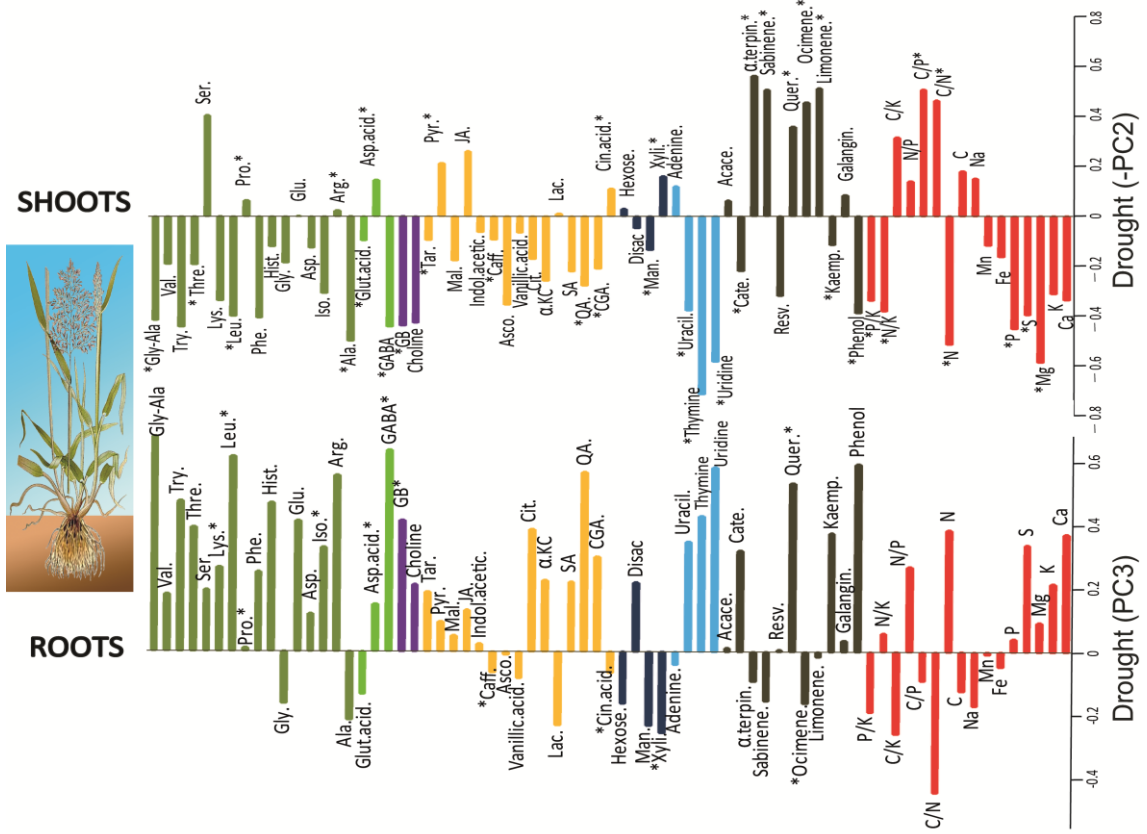

278  
 279  
 280  
 281  
 282  
 283  
 284  
 285  
 286  
 287  
 288  
 289  
 290  
 291  
 292

293 **Figure S3**

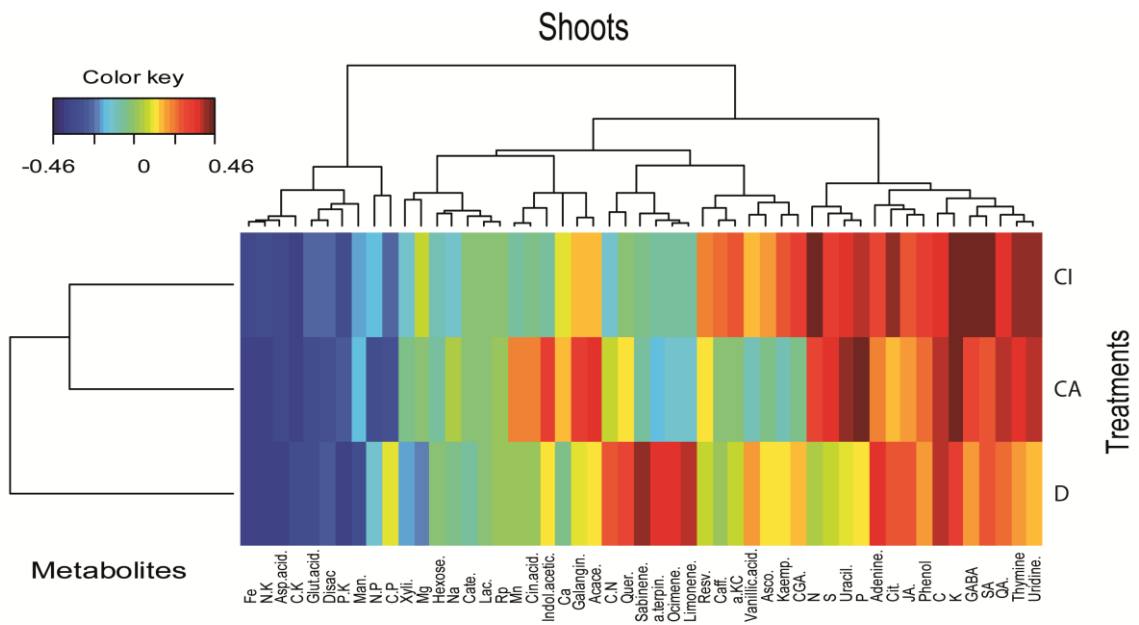

294

295

296

297

298

299

300

301

302

303

304

305

306

307

308

309

310

311

312 **Figure S4**  
 313  
 314

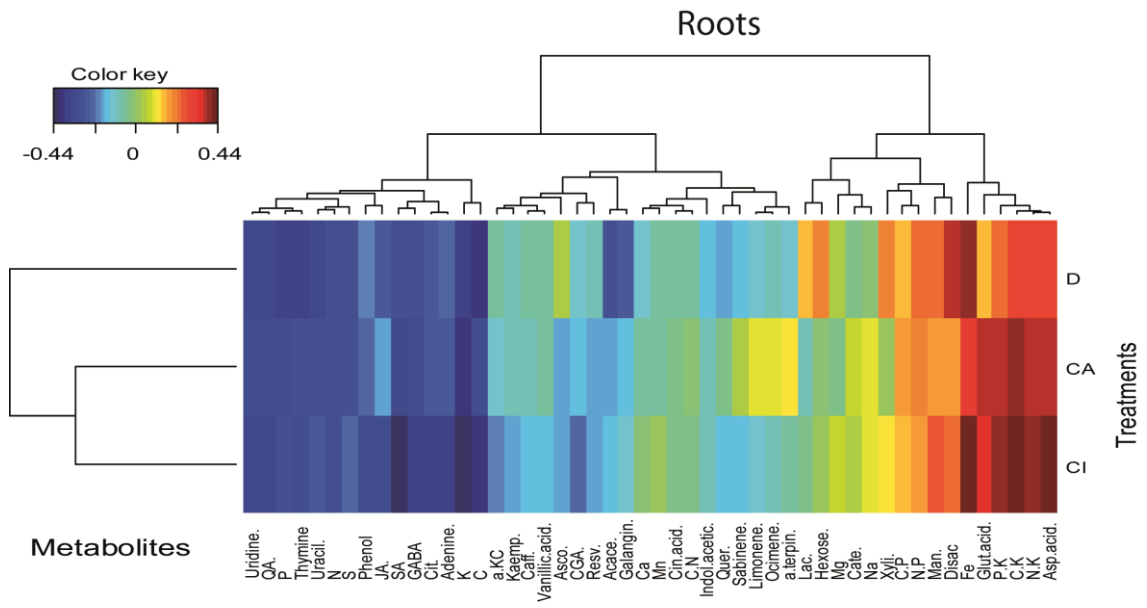

315  
 316  
 317

| September             |   |          |          |   |          |         |   |          |         |  |          |          |  |          |         |  |          |         |
|-----------------------|---|----------|----------|---|----------|---------|---|----------|---------|--|----------|----------|--|----------|---------|--|----------|---------|
| <i>Holcus lanatus</i> |   |          |          |   |          |         |   |          |         |  |          |          |  |          |         |  |          |         |
| Shoots                |   |          |          |   |          |         |   |          | Roots   |  |          |          |  |          |         |  |          |         |
| Variable              |   | IC       | SE       |   | AC       | SE      |   | D        | SE      |  | IC       | SE       |  | AC       | SE      |  | D        | SE      |
| Ala*                  |   | 5455431  | 624577   | a | 6639353  | 493427  | b | 3864623  | 397456  |  | 6750587  | 775560   |  | 10025088 | 1260622 |  | 7250622  | 801666  |
| Arg*                  |   | 1448845  | 416475   |   | 1209846  | 300465  |   | 739206   | 131341  |  | 44010036 | 11786233 |  | 36190424 | 4732251 |  | 44841135 | 8914997 |
| Iso*                  |   | 2686151  | 465113   |   | 2423925  | 176064  |   | 2033295  | 219109  |  | 196396   | 56493    |  | 220851   | 89209   |  | 232366   | 60983   |
| Asp*                  |   | 2948222  | 790135   |   | 2541489  | 731817  |   | 2927460  | 660436  |  | 59858362 | 8163959  |  | 66039992 | 9467349 |  | 56416501 | 9734547 |
| Glu*                  |   | 6179981  | 1358115  |   | 7600689  | 1044119 |   | 5637589  | 700774  |  | 39687107 | 5465667  |  | 43904547 | 4542300 |  | 42488429 | 6671411 |
| Gly*                  |   | 98231    | 19386    |   | 85696    | 21092   |   | 48445    | 7486    |  | 500154   | 63513    |  | 616261   | 92449   |  | 552083   | 106649  |
| Hist*                 |   | 669726   | 173641   |   | 651973   | 139562  |   | 504570   | 92413   |  | 1958896  | 423251   |  | 2561680  | 666249  |  | 3453608  | 1046381 |
| Phe*                  |   | 54036325 | 10079646 |   | 44582844 | 4965201 |   | 39417286 | 3433630 |  | 3437841  | 706953   |  | 3868052  | 952576  |  | 4779895  | 1092501 |
| Pro*                  |   | 4607987  | 882696   |   | 5538016  | 799669  |   | 4166606  | 808808  |  | 7678912  | 1685327  |  | 7533019  | 1564328 |  | 7227301  | 956754  |
| Leu*                  |   | 59813541 | 8400371  |   | 58280471 | 3921053 |   | 45314490 | 3505937 |  | 7171776  | 1944186  |  | 9691050  | 3504836 |  | 5889631  | 1672844 |
| Lys*                  |   | 235067   | 62889    |   | 201504   | 36289   |   | 148370   | 17131   |  | 920860   | 354866   |  | 866942   | 235523  |  | 1159793  | 332619  |
| Ser'                  |   | 603620   | 83219    |   | 759698   | 62647   |   | 561877   | 48059   |  | 3092939  | 316180   |  | 3680457  | 502723  |  | 3178780  | 418300  |
| Thre*                 |   | 1617625  | 290899   |   | 1764917  | 176906  |   | 1294610  | 135770  |  | 6143189  | 559020   |  | 6349332  | 561841  |  | 7359756  | 807336  |
| Try*                  |   | 9793482  | 1650831  |   | 8219506  | 906220  |   | 7297803  | 729224  |  | 2019635  | 512423   |  | 2488897  | 493989  |  | 2093133  | 688109  |
| Val*                  |   | 40814944 | 5343724  | a | 46761649 | 2523763 | b | 30467341 | 2153153 |  | 26225073 | 3903888  |  | 26623730 | 3550549 |  | 30330018 | 2643822 |
| Gly-Ala'              | a | 0.332    | 0.026    | a | 0.326    | 0.017   | b | 0.23     | 0.011   |  | 0.174    | 0.017    |  | 0.162    | 0.007   |  | 0.199    | 0.028   |
| GABA'                 | a | 1.263    | 0.097    | a | 1.152    | 0.061   | b | 0.876    | 0.049   |  | 0.47     | 0.043    |  | 0.562    | 0.063   |  | 0.566    | 0.072   |
| Glu.acid*             |   | 23804619 | 2904783  |   | 23629189 | 1803661 |   | 18003391 | 1539546 |  | 66017523 | 4190089  |  | 78914864 | 8171632 |  | 79044423 | 9036087 |
| Asp.acid*             |   | 1698053  | 334055   |   | 2055660  | 274088  |   | 1936930  | 223725  |  | 12536500 | 867457   |  | 12901067 | 709836  |  | 13130242 | 1110519 |
| Choline'              |   | 7.156    | 0.571    |   | 6.841    | 0.639   |   | 6.031    | 0.514   |  | 3.877    | 0.257    |  | 3.599    | 0.306   |  | 3.624    | 0.234   |
| GB                    |   | 1.872    | 0.278    |   | 1.628    | 0.092   |   | 1.293    | 0.06    |  | 0.409    | 0.039    |  | 0.389    | 0.014   |  | 0.478    | 0.056   |
| Lac*                  |   | 4694190  | 538070   |   | 4312700  | 529887  |   | 3446182  | 337528  |  | 5073644  | 542814   |  | 4289147  | 497438  |  | 4790938  | 335722  |
| $\alpha$ -KC'         | a | 1422388  | 112990   | a | 1420664  | 70151   | b | 818217   | 107621  |  | 1544921  | 276213   |  | 1179973  | 119017  |  | 1248525  | 97969   |
| Cit*                  | a | 84036287 | 8167619  |   | 80713691 | 3521040 | b | 59695317 | 6409887 |  | 37589959 | 1689142  |  | 43488555 | 4529200 |  | 50414156 | 5581168 |
| Van.acd*              |   | 3396     | 570      |   | 2905     | 1058    |   | 4286     | 788     |  | 1045     | 187      |  | 820      | 103     |  | 993      | 139     |
| Asco*                 |   | 30743    | 4902     |   | 28712    | 5156    |   | 30052    | 5718    |  | 26571    | 3062     |  | 208602   | 81375   |  | 101516   | 48172   |

|           |   |           |          |   |           |          |   |           |          |   |          |         |   |          |         |   |          |          |
|-----------|---|-----------|----------|---|-----------|----------|---|-----------|----------|---|----------|---------|---|----------|---------|---|----------|----------|
| Caff*     |   | 40800     | 18633    |   | 18778     | 5149     |   | 50134     | 10155    | a | 2119     | 519     | b | 464      | 316     | a | 2156     | 383      |
| Ind.acec* | b | 6825121   | 1297755  | a | 14981674  | 1606183  | b | 5872145   | 1071198  |   | 1008198  | 151606  |   | 876357   | 188359  |   | 1219381  | 304645   |
| JA*       |   | 9616699   | 1539022  | a | 13058260  | 1579887  | b | 6777360   | 1424243  |   | 4369771  | 147898  |   | 2439761  | 935132  |   | 3383360  | 635873   |
| Mal*      |   | 54809318  | 4955887  | a | 65126827  | 6770372  | b | 41122316  | 5954486  |   | 35170452 | 2653927 |   | 34331418 | 4760079 |   | 24032907 | 7481701  |
| Pyr*      | b | 1448099   | 205592   | a | 2474932   | 355360   | b | 1406518   | 249547   |   | 1446319  | 416679  |   | 8108318  | 3037771 |   | 5686547  | 2069362  |
| Tar*      |   | 35745     | 8185     |   | 40308     | 7155     |   | 757405    | 466359   |   | 54449    | 4921    | b | 38036    | 26026   | a | 140042   | 42746    |
| CGA*      |   | 16054258  | 4167074  |   | 4579973   | 1647834  |   | 10295418  | 2990894  |   | 975068   | 388414  |   | 15418873 | 8716145 |   | 11916170 | 11707045 |
| QA*       | b | 11222785  | 1317473  | a | 14291538  | 1384265  |   | 14822987  | 2661150  |   | 1281808  | 116707  |   | 1382891  | 85903   |   | 1560283  | 121679   |
| SA'       | a | 0.32      | 0.02     | a | 0.31      | 0.01     | b | 0.25      | 0.02     |   | 0.1      | 0       |   | 0.11     | 0       |   | 0.12     | 0.01     |
| Cin acid* |   | 7408      | 2553     |   | 3041      | 385      |   | 2448      | 330      |   | 1764     | 475     |   | 1126     | 91      |   | 1760     | 442      |
| Xyli*     |   | 2047084   | 374523   |   | 2433857   | 374431   |   | 2159874   | 315702   | b | 570148   | 118206  | b | 1030445  | 720628  | a | 3819043  | 980772   |
| Man*      | a | 11639988  | 1778613  |   | 9152230   | 1223099  | b | 6711565   | 766968   |   | 13992699 | 682442  |   | 11696230 | 3586868 |   | 15430845 | 3042879  |
| Disac'    |   | 2659448   | 827430   |   | 2226574   | 996949   |   | 1568790   | 411188   |   | 14896661 | 1201890 |   | 15093457 | 1887800 |   | 15276314 | 1569367  |
| Hexose*   | b | 11401561  | 924384   | a | 21614456  | 1273569  | c | 7177151   | 1199880  |   | 14198373 | 718095  |   | 16704542 | 2664848 |   | 15803355 | 1276335  |
| Uridine*  |   | 1561095   | 205568   | a | 1690784   | 186202   | b | 975113    | 105842   |   | 67568    | 4931    |   | 80563    | 2998    |   | 105250   | 21769    |
| Thymine'  |   | 13954526  | 559635   |   | 15316877  | 905232   |   | 13734843  | 657979   |   | 2413691  | 353504  |   | 3447244  | 358018  |   | 3097845  | 547322   |
| Uracil*   | a | 3531356   | 453544   | a | 3993568   | 322034   | b | 2273465   | 205522   |   | 12729    | 2417    |   | 19693    | 4493    |   | 10995    | 2413     |
| Adenine*  |   | 2940441   | 318182   |   | 3027380   | 208455   |   | 2474247   | 106686   | a | 633446   | 46675   | b | 269024   | 77756   | b | 340244   | 62437    |
| Phenol'   |   | 0.145     | 0.026    | a | 0.22      | 0.063    | b | 0.059     | 0.018    |   | 0.046    | 0.008   |   | 0.095    | 0.025   |   | 0.075    | 0.005    |
| Galangi*  |   | 2757832   | 701519   |   | 4210309   | 707770   |   | 2264981   | 718975   | b | 449      | 72      |   | 848      | 201     | a | 1319     | 286      |
| Kaemp*    |   | 392000    | 67652    |   | 597713    | 219853   |   | 648873    | 148468   |   | 850      | 186     |   | 635      | 113     |   | 744      | 148      |
| Limone*   | b | 2217      | 345      | a | 4084      | 655      | b | 2263      | 326      | b | 1210     | 208     | a | 17976    | 6831    | b | 3427     | 740      |
| Ocimen*   |   | 4690      | 1449     |   | 9824      | 2357     |   | 4675      | 871      | b | 2566     | 419     | a | 64858    | 27273   |   | 12027    | 6024     |
| Quer*     |   | 226265    | 107675   |   | 947025    | 300088   |   | 732522    | 339246   |   | 1335     | 466     |   | 614      | 286     |   | 2062     | 610      |
| Resv*     |   | 6486      | 1036     |   | 5278      | 931      |   | 6572      | 987      |   | 3480     | 520     |   | 3684     | 709     |   | 3747     | 523      |
| Sabinen*  | b | 2398      | 403      | a | 5490      | 1038     |   | 4669      | 825      | b | 1307     | 212     | a | 19551    | 8366    |   | 3836     | 1267     |
| a-terpin* |   | 1692      | 275      |   | 2063      | 299      |   | 2057      | 349      | b | 864      | 143     | a | 18838    | 7054    |   | 6457     | 3981     |
| Cate*     |   | 5391965   | 1068238  |   | 7046830   | 2088802  |   | 7170013   | 1822377  |   | 608639   | 195703  |   | 7979989  | 2753367 |   | 9211987  | 3896121  |
| Acace*    |   | 173350479 | 31813040 |   | 254863936 | 29019444 |   | 183402611 | 25963933 | b | 14437    | 6960    |   | 43774    | 21435   | a | 87999    | 25361    |
| Ca        |   | 0.537     | 0.028    |   | 0.535     | 0.025    |   | 0.528     | 0.021    |   | 0.364    | 0.048   |   | 0.332    | 0.021   |   | 0.383    | 0.032    |
| K         |   | 2.451     | 0.105    |   | 2.257     | 0.098    |   | 2.373     | 0.113    |   | 0.614    | 0.033   |   | 0.608    | 0.036   |   | 0.612    | 0.015    |
| Mg        |   | 0.227     | 0.01     |   | 0.221     | 0.011    |   | 0.227     | 0.008    |   | 0.177    | 0.013   |   | 0.171    | 0.012   |   | 0.181    | 0.007    |
| S         |   | 0.312     | 0.017    |   | 0.293     | 0.016    |   | 0.278     | 0.012    |   | 0.131    | 0.006   |   | 0.126    | 0.003   |   | 0.131    | 0.004    |
| P         |   | 0.321     | 0.011    |   | 0.317     | 0.015    |   | 0.31      | 0.012    |   | 0.12     | 0.006   |   | 0.125    | 0.007   |   | 0.119    | 0.005    |

|     |          |              |              |          |              |              |          |              |              |  |              |              |  |              |              |  |             |              |
|-----|----------|--------------|--------------|----------|--------------|--------------|----------|--------------|--------------|--|--------------|--------------|--|--------------|--------------|--|-------------|--------------|
| Fe  |          | 1.018        | 0.26         |          | 0.502        | 0.058        |          | 0.737        | 0.123        |  | 6.846        | 0.81         |  | 6.183        | 0.693        |  | 6.101       | 0.523        |
| Mn  |          | 0.697        | 0.055        |          | 0.755        | 0.036        |          | 0.784        | 0.051        |  | 0.51         | 0.04         |  | 0.568        | 0.046        |  | 0.471       | 0.044        |
| Na  |          | 0.258        | 0.1          |          | 0.225        | 0.074        |          | 0.128        | 0.023        |  | 0.224        | 0.036        |  | 0.203        | 0.027        |  | 0.148       | 0.011        |
| C   |          | 43.3         | 0.3          |          | 44           | 0.2          |          | 43.6         | 0.3          |  | 37           | 0.9          |  | 38.7         | 0.6          |  | 38.1        | 0.9          |
| N   |          | 1.75         | 0.07         |          | 1.67         | 0.07         |          | 1.63         | 0.07         |  | 1.04         | 0.05         |  | 1.02         | 0.04         |  | 1.04        | 0.04         |
| C/N |          | 39.8         | 4.2          |          | 38.2         | 2.5          |          | 53.5         | 6.2          |  | 42.2         | 1.3          |  | 38.9         | 1.4          |  | 41.9        | 2.2          |
| C/P | <b>b</b> | <b>207</b>   | <b>18</b>    | <b>b</b> | <b>200</b>   | <b>13</b>    | <b>a</b> | <b>313</b>   | <b>41</b>    |  | <b>336</b>   | <b>13</b>    |  | <b>310</b>   | <b>13</b>    |  | <b>333</b>  | <b>21</b>    |
| N/P |          | 5.44         | 0.27         |          | 5.3          | 0.24         |          | 5.95         | 0.34         |  | 7.98         | 0.2          |  | 8.03         | 0.34         |  | 8.02        | 0.41         |
| C/K |          | 21.4         | 1.8          |          | 21           | 1.5          |          | 24.3         | 1.8          |  | 61.8         | 4            |  | 56.2         | 3.4          |  | 53.3        | 4.3          |
| N/K |          | 0.565        | 0.029        |          | 0.552        | 0.019        |          | 0.487        | 0.031        |  | 1.475        | 0.098        |  | 1.462        | 0.104        |  | 1.297       | 0.096        |
| P/K | <b>a</b> | <b>0.105</b> | <b>0.004</b> | <b>a</b> | <b>0.104</b> | <b>0.005</b> | <b>b</b> | <b>0.083</b> | <b>0.005</b> |  | <b>0.185</b> | <b>0.012</b> |  | <b>0.182</b> | <b>0.008</b> |  | <b>0.16</b> | <b>0.008</b> |

319

320 Table S2

| September                   |          |          |         |          |          |         |          |          |         |          |           |          |          |           |          |          |           |          |
|-----------------------------|----------|----------|---------|----------|----------|---------|----------|----------|---------|----------|-----------|----------|----------|-----------|----------|----------|-----------|----------|
| <i>Alopecurus pratensis</i> |          |          |         |          |          |         |          |          |         |          |           |          |          |           |          |          |           |          |
| Shoots                      |          |          |         |          |          |         |          |          | Roots   |          |           |          |          |           |          |          |           |          |
| Variable                    |          | IC       | SE      |          | AC       | SE      |          | D        | SE      |          | IC        | SE       |          | AC        | SE       |          | D         | SE       |
| Ala*                        |          | 7572377  | 674946  | <b>a</b> | 9216009  | 764756  | <b>b</b> | 5347012  | 702880  | <b>a</b> | 10366122  | 1350641  | <b>a</b> | 10418354  | 851736   | <b>b</b> | 6391906   | 478989   |
| Arg*                        |          | 372717   | 77114   |          | 343082   | 88773   |          | 463026   | 171892  |          | 101560409 | 15032972 |          | 140878319 | 20615519 |          | 126650420 | 20110959 |
| Iso*                        |          | 1915150  | 318525  |          | 1919674  | 360070  |          | 1434047  | 165303  | <b>b</b> | 270934    | 84758    | <b>b</b> | 391254    | 76690    | <b>a</b> | 927321    | 193704   |
| Asp*                        |          | 556647   | 202167  |          | 668653   | 190896  |          | 657108   | 210238  |          | 62789795  | 8137879  |          | 76707339  | 7675783  |          | 58553386  | 9099864  |
| Glu*                        |          | 3337800  | 490207  |          | 3140652  | 387983  |          | 2179904  | 349589  |          | 72398714  | 8502936  |          | 92176682  | 8892031  |          | 79290205  | 6812345  |
| Gly*                        |          | 92162    | 24124   |          | 72833    | 19774   |          | 71380    | 27864   |          | 284830    | 66721    |          | 338145    | 119172   |          | 227275    | 68253    |
| Hist*                       |          | 56802    | 11804   |          | 42742    | 13886   |          | 58836    | 14913   |          | 9709370   | 1841136  |          | 17972077  | 2991785  |          | 17595147  | 3446377  |
| Phe*                        |          | 16453950 | 2370178 |          | 17891867 | 2469577 |          | 13858089 | 2428793 | <b>b</b> | 3404028   | 421423   | <b>b</b> | 4224345   | 553822   | <b>a</b> | 9442315   | 2378486  |
| Pro*                        |          | 6368062  | 1160727 |          | 6778407  | 994927  |          | 3622349  | 807927  | <b>b</b> | 21249561  | 2458040  | <b>b</b> | 26914543  | 5251231  | <b>a</b> | 22573458  | 3442706  |
| Leu*                        |          | 47128106 | 6256758 |          | 47062712 | 5173610 |          | 38545588 | 3910896 |          | 15613419  | 2941281  |          | 15038232  | 1812522  | <b>a</b> | 29221223  | 6260365  |
| Lys*                        |          | 153083   | 41808   |          | 107198   | 16731   |          | 76587    | 10909   | <b>b</b> | 1902829   | 482613   |          | 2994901   | 541022   |          | 5420794   | 1293365  |
| Ser'                        | <b>a</b> | 822639   | 78138   |          | 688766   | 106197  | <b>b</b> | 459560   | 65864   |          | 4300440   | 293695   |          | 4266948   | 189746   |          | 3977621   | 179655   |

15

|           |   |           |          |   |           |          |   |           |          |   |          |         |   |          |          |   |          |         |
|-----------|---|-----------|----------|---|-----------|----------|---|-----------|----------|---|----------|---------|---|----------|----------|---|----------|---------|
| Thre*     |   | 1976269   | 192851   | a | 2160133   | 273405   | b | 1336627   | 149122   |   | 10205030 | 1151881 |   | 10156174 | 1126756  |   | 10227199 | 905509  |
| Try*      |   | 3743871   | 467677   |   | 2995797   | 289025   |   | 2856758   | 229550   | b | 3439104  | 540632  |   | 5687921  | 827267   | a | 8169990  | 1875464 |
| Val*      | a | 22849195  | 4554467  |   | 18607847  | 1195634  | b | 13619421  | 1192453  |   | 31726153 | 3616517 |   | 28755963 | 1843799  |   | 35127268 | 2618835 |
| Gly-Ala'  |   | 0.432     | 0.024    |   | 0.384     | 0.018    |   | 0.408     | 0.019    | b | 0.208    | 0.017   |   | 0.247    | 0.022    | a | 0.273    | 0.017   |
| GABA'     |   | 1.515     | 0.1      |   | 1.398     | 0.082    |   | 1.439     | 0.087    | b | 0.54     | 0.035   |   | 0.656    | 0.049    | a | 0.724    | 0.048   |
| Glu.acid* | a | 25251306  | 1348267  |   | 22813775  | 1635244  | b | 18100268  | 2170473  |   | 70340769 | 5282221 |   | 68440360 | 3546119  |   | 59075589 | 9190637 |
| Asp.acid* |   | 1378519   | 151958   |   | 1348719   | 238489   |   | 1175411   | 239541   |   | 14989931 | 789395  | a | 16130693 | 1246098  | b | 12505506 | 753090  |
| Choline'  | a | 7.906     | 0.458    | b | 6.401     | 0.401    |   | 6.79      | 0.319    |   | 3.959    | 0.443   |   | 4.172    | 0.262    |   | 4.653    | 0.307   |
| GB        |   | 1.081     | 0.087    |   | 1.018     | 0.081    |   | 0.975     | 0.053    |   | 0.435    | 0.03    |   | 0.524    | 0.042    |   | 0.604    | 0.065   |
| Lac*      | a | 5599854   | 383671   |   | 4502833   | 454475   | b | 4238240   | 251878   | b | 3873338  | 470025  | a | 6829539  | 572155   | a | 5686787  | 336312  |
| a-KC'     |   | 4064042   | 290066   |   | 3231990   | 312469   |   | 4160517   | 320661   | b | 1162989  | 109650  |   | 1599549  | 147641   | a | 2040850  | 186089  |
| Cit*      |   | 131298694 | 12221827 |   | 115239885 | 8428440  |   | 121611533 | 8577289  | b | 34146430 | 2778997 | a | 49477761 | 4572587  |   | 38196145 | 3618848 |
| Van.acd*  |   | 177267    | 107947   |   | 15475     | 4346     |   | 44356     | 17541    |   | 1528     | 223     |   | 1518     | 305      |   | 1227     | 105     |
| Asco*     | b | 1229757   | 191624   | b | 3858731   | 1809204  | a | 11123293  | 2088670  |   | 42669    | 13208   | a | 56662    | 7316     | b | 8535     | 3499    |
| Caff*     |   | 18458     | 2761     |   | 300967    | 131960   |   | 1201766   | 559270   | b | 5284     | 1718    | a | 101636   | 38332    | b | 406      | 217     |
| Ind.acec* |   | 904603    | 478853   |   | 65262     | 18158    |   | 425297    | 146656   | b | 8222     | 2518    | a | 10208130 | 3780032  | b | 8623     | 4173    |
| JA*       |   | 11894814  | 1458547  |   | 14605350  | 1938150  |   | 11722683  | 1711688  | b | 1006920  | 158932  | a | 11025249 | 3015063  | b | 703507   | 346828  |
| Mal*      | a | 128988859 | 11105557 | b | 78950501  | 8388005  | b | 77256459  | 3336267  | b | 24780986 | 5735540 | a | 55092859 | 10964353 | b | 26121979 | 2819533 |
| Pyr*      | b | 2613649   | 457472   |   | 4593008   | 1654581  | a | 7572643   | 627420   | a | 1745666  | 309852  | a | 1728967  | 134390   | b | 672771   | 266632  |
| Tar*      | a | 50714     | 10088    |   | 21460     | 4230     | b | 23297     | 7826     |   | 76856    | 26447   |   | 1130575  | 510165   |   | 344330   | 261134  |
| CGA*      |   | 93726536  | 10860264 |   | 76707553  | 16524993 |   | 75181534  | 12338149 | b | 10823630 | 2578735 |   | 16076685 | 2183497  | a | 19829187 | 2906008 |
| QA*       |   | 7511615   | 678430   |   | 6871627   | 518446   |   | 8834277   | 997018   | b | 1494173  | 82520   |   | 1873872  | 136994   | a | 2032097  | 152239  |
| SA'       |   | 0.437     | 0.026    |   | 0.444     | 0.034    |   | 0.429     | 0.037    | b | 0.095    | 0.003   |   | 0.108    | 0.005    | a | 0.125    | 0.012   |
| Cin acid* |   | 1799      | 332      |   | 2930      | 207      |   | 3078      | 627      |   | 2039     | 619     |   | 2395     | 900      |   | 1851     | 331     |
| Xyli*     |   | 1628301   | 134190   | a | 1755966   | 311053   | b | 936235    | 201822   | b | 977359   | 152045  | a | 4024122  | 316725   | b | 381660   | 198437  |
| Man*      | b | 4281877   | 225901   | a | 7239618   | 240296   | c | 1921749   | 751123   | a | 12548016 | 2627738 |   | 10694587 | 922490   | b | 5608439  | 1480064 |
| Disac'    |   | 5819064   | 1276810  | a | 7965761   | 1425752  | b | 2591909   | 544987   | b | 13271875 | 2099635 | b | 13493275 | 1270630  | a | 21947680 | 1134536 |
| Hexose*   | a | 27348862  | 2268938  |   | 23780934  | 1596897  | b | 18734183  | 1352806  |   | 15546229 | 2144596 |   | 17976984 | 1066861  |   | 16213205 | 1639934 |
| Uridine*  |   | 1246051   | 115708   |   | 1239193   | 151306   |   | 966210    | 58678    | b | 67624    | 4411    |   | 88197    | 5080     | a | 118728   | 16868   |
| Thymine'  |   | 8063370   | 529474   |   | 7051695   | 590186   |   | 8875841   | 1327542  |   | 1514789  | 190418  | b | 1252484  | 185416   | a | 2092291  | 313635  |
| Uracil*   | a | 2637213   | 199245   |   | 2106013   | 346466   | b | 1603573   | 222293   |   | 23461    | 5913    |   | 28857    | 4745     |   | 33704    | 5804    |
| Adenine*  | a | 5667426   | 540743   | b | 4200037   | 278057   | b | 3962768   | 186394   | b | 254032   | 49170   | a | 1163841  | 178162   | b | 95611    | 40633   |
| Phenol'   |   | 0.263     | 0.013    |   | 0.246     | 0.022    |   | 0.266     | 0.023    |   | 0.079    | 0.007   |   | 0.097    | 0.007    |   | 0.099    | 0.009   |
| Galangi*  |   | 29821     | 9577     | a | 85003     | 33916    | b | 13795     | 4228     | b | 212      | 75      |   | 449      | 50       | a | 955      | 294     |



|                |          |               |              |          |                |                |          |                |                |          |                |                |          |                |                |          |                |                |
|----------------|----------|---------------|--------------|----------|----------------|----------------|----------|----------------|----------------|----------|----------------|----------------|----------|----------------|----------------|----------|----------------|----------------|
| <b>Kaemp*</b>  |          | <b>5573</b>   | <b>1440</b>  |          | <b>6443</b>    | <b>2227</b>    |          | <b>34746</b>   | <b>15657</b>   |          | <b>619</b>     | <b>143</b>     | <b>a</b> | <b>1135</b>    | <b>333</b>     | <b>b</b> | <b>119</b>     | <b>72</b>      |
| Limone*        |          | 2048          | 274          |          | 1206           | 145            |          | 17235          | 7764           |          | 1972           | 362            |          | 1722           | 305            |          | 1582           | 177            |
| <b>Ocimen*</b> |          | <b>10425</b>  | <b>1929</b>  | <b>b</b> | <b>6952</b>    | <b>998</b>     | <b>a</b> | <b>31951</b>   | <b>9891</b>    |          | <b>3925</b>    | <b>413</b>     |          | <b>3218</b>    | <b>515</b>     |          | <b>4260</b>    | <b>598</b>     |
| <b>Quer*</b>   | <b>b</b> | <b>22895</b>  | <b>9725</b>  | <b>a</b> | <b>7572818</b> | <b>1998202</b> | <b>b</b> | <b>2342062</b> | <b>1026639</b> | <b>b</b> | <b>394</b>     | <b>37</b>      | <b>a</b> | <b>1721534</b> | <b>650547</b>  | <b>b</b> | <b>135</b>     | <b>45</b>      |
| Resv*          |          | 5228          | 925          |          | 4244           | 689            |          | 5109           | 568            |          | 3349           | 445            |          | 2238           | 246            |          | 2950           | 360            |
| Sabinen*       |          | 4510          | 897          |          | 2248           | 334            |          | 17728          | 7811           |          | 1425           | 278            |          | 1558           | 199            |          | 1430           | 192            |
| a-terpin*      |          | 1677          | 286          |          | 1278           | 103            |          | 8501           | 3113           |          | 929            | 144            |          | 1028           | 159            |          | 942            | 111            |
| <b>Cate*</b>   |          | <b>339801</b> | <b>67493</b> | <b>b</b> | <b>286171</b>  | <b>33756</b>   | <b>a</b> | <b>529182</b>  | <b>72535</b>   |          | <b>1789339</b> | <b>1687347</b> |          | <b>9829562</b> | <b>3548325</b> |          | <b>7379870</b> | <b>3401462</b> |
| Acace*         |          | 2121371       | 992474       |          | 6175414        | 2428878        |          | 2742925        | 1166878        |          | 4416           | 1658           |          | 2058           | 621            |          | 1845           | 567            |
| <b>Ca</b>      |          | <b>0.306</b>  | <b>0.023</b> |          | <b>0.292</b>   | <b>0.017</b>   |          | <b>0.332</b>   | <b>0.009</b>   |          | <b>0.374</b>   | <b>0.024</b>   |          | <b>0.323</b>   | <b>0.014</b>   |          | <b>0.372</b>   | <b>0.021</b>   |
| <b>K</b>       |          | <b>2.137</b>  | <b>0.048</b> |          | <b>2.209</b>   | <b>0.046</b>   |          | <b>2.151</b>   | <b>0.086</b>   |          | <b>0.603</b>   | <b>0.034</b>   |          | <b>0.604</b>   | <b>0.018</b>   |          | <b>0.711</b>   | <b>0.042</b>   |
| <b>Mg</b>      |          | <b>0.155</b>  | <b>0.005</b> |          | <b>0.137</b>   | <b>0.009</b>   |          | <b>0.161</b>   | <b>0.009</b>   |          | <b>0.169</b>   | <b>0.008</b>   |          | <b>0.162</b>   | <b>0.007</b>   |          | <b>0.179</b>   | <b>0.01</b>    |
| <b>S</b>       |          | <b>0.224</b>  | <b>0.017</b> |          | <b>0.2</b>     | <b>0.016</b>   |          | <b>0.201</b>   | <b>0.011</b>   | <b>b</b> | <b>0.135</b>   | <b>0.003</b>   | <b>b</b> | <b>0.137</b>   | <b>0.004</b>   | <b>a</b> | <b>0.154</b>   | <b>0.005</b>   |
| <b>P</b>       |          | <b>0.229</b>  | <b>0.013</b> |          | <b>0.212</b>   | <b>0.022</b>   |          | <b>0.214</b>   | <b>0.009</b>   | <b>b</b> | <b>0.097</b>   | <b>0.003</b>   |          | <b>0.103</b>   | <b>0.003</b>   | <b>a</b> | <b>0.112</b>   | <b>0.004</b>   |
| Fe             |          | 0.387         | 0.169        |          | 0.228          | 0.031          |          | 0.445          | 0.146          |          | 6.139          | 0.477          |          | 5.801          | 0.39           |          | 6.241          | 0.523          |
| Mn             |          | 0.323         | 0.04         |          | 0.367          | 0.035          |          | 0.375          | 0.033          |          | 0.461          | 0.048          |          | 0.511          | 0.043          |          | 0.615          | 0.072          |
| Na             |          | 0.1           | 0            |          | 0.1            | 0              |          | 0.1            | 0              |          | 0.147          | 0.017          |          | 0.146          | 0.011          |          | 0.142          | 0.017          |
| <b>C</b>       | <b>a</b> | <b>45.4</b>   | <b>0.3</b>   | <b>b</b> | <b>43.7</b>    | <b>0.2</b>     | <b>b</b> | <b>44.3</b>    | <b>0.3</b>     |          | <b>36.3</b>    | <b>0.6</b>     |          | <b>35.8</b>    | <b>0.6</b>     |          | <b>36.9</b>    | <b>0.7</b>     |
| N              |          | 1.66          | 0.04         |          | 1.61           | 0.08           |          | 1.6            | 0.05           |          | 1.14           | 0.05           |          | 1.14           | 0.05           |          | 1.13           | 0.04           |
| <b>C/N</b>     | <b>b</b> | <b>34.3</b>   | <b>1.6</b>   |          | <b>37.4</b>    | <b>1.1</b>     | <b>a</b> | <b>40.9</b>    | <b>1.5</b>     |          | <b>32.8</b>    | <b>1</b>       |          | <b>33.6</b>    | <b>1.4</b>     |          | <b>33.6</b>    | <b>1.1</b>     |
| C/P            |          | 311           | 13           |          | 338            | 17             |          | 372            | 26             |          | 376            | 13             |          | 380            | 16             |          | 357            | 15             |
| N/P            |          | 9.14          | 0.36         |          | 9.13           | 0.56           |          | 9.1            | 0.52           |          | 11.5           | 0.31           |          | 11.45          | 0.54           |          | 10.75          | 0.51           |
| C/K            |          | 23.8          | 0.8          |          | 25.5           | 0.8            |          | 30.7           | 3.9            |          | 59             | 4.6            |          | 57.3           | 3.7            |          | 51.8           | 4.1            |
| N/K            |          | 0.704         | 0.03         |          | 0.686          | 0.023          |          | 0.776          | 0.114          |          | 1.816          | 0.146          |          | 1.734          | 0.116          |          | 1.562          | 0.142          |
| P/K            |          | 0.078         | 0.004        |          | 0.078          | 0.006          |          | 0.091          | 0.015          |          | 0.157          | 0.012          |          | 0.152          | 0.009          |          | 0.144          | 0.01           |

321

322

323

324

| July                  |   |          |          |   |          |         |   |          |          |   |          |          |   |           |          |   |           |          |
|-----------------------|---|----------|----------|---|----------|---------|---|----------|----------|---|----------|----------|---|-----------|----------|---|-----------|----------|
| <i>Holcus lanatus</i> |   |          |          |   |          |         |   |          |          |   |          |          |   |           |          |   |           |          |
| Shoots                |   |          |          |   |          |         |   |          | Roots    |   |          |          |   |           |          |   |           |          |
| Variable              |   | IC       | SE       |   | AC       | SE      |   | D        | SE       |   | IC       | SE       |   | AC        | SE       |   | D         | SE       |
| Ala*                  | b | 7318030  | 521211   | a | 8961091  | 383217  | c | 5645469  | 526691   |   | 13342817 | 1138047  |   | 12010155  | 1573799  |   | 14176059  | 1510350  |
| Arg*                  | b | 170716   | 16834    |   | 209135   | 26985   | a | 316220   | 66056    |   | 18067052 | 4389170  |   | 19726514  | 5462656  |   | 20324161  | 3191790  |
| Iso*                  |   | 2069390  | 214738   | a | 2665462  | 331565  | b | 1169995  | 268531   | c | 356573   | 79344    | b | 1182611   | 254488   | a | 179647    | 64644    |
| Asp*                  | b | 2302049  | 517102   | a | 6634759  | 1730245 |   | 3771146  | 763338   |   | 73748349 | 14726847 |   | 108776330 | 14465602 |   | 84195119  | 11014748 |
| Glu*                  |   | 3795371  | 435636   |   | 5285321  | 764162  |   | 6292320  | 1006188  | b | 61316221 | 6506272  | b | 72358358  | 8160513  | a | 98828574  | 7494726  |
| Gly*                  |   | 115788   | 21297    |   | 127146   | 21971   |   | 101995   | 23213    | a | 386585   | 90766    | b | 161768    | 35043    | b | 151808    | 21613    |
| Hist*                 |   | 187119   | 36133    |   | 267522   | 36598   |   | 245677   | 49673    |   | 1304499  | 583010   |   | 1527794   | 627434   |   | 950817    | 303684   |
| Phe*                  | a | 37473454 | 4761687  | a | 41018992 | 4708185 | b | 20267741 | 3441332  |   | 6214325  | 2189552  | a | 8209455   | 1634692  | b | 2179498   | 313530   |
| Pro*                  |   | 10880348 | 7151750  |   | 8428573  | 1654973 |   | 24745030 | 10053053 | b | 7608233  | 1213361  | b | 22183502  | 4652128  | a | 100886213 | 17464972 |
| Leu*                  | a | 54743428 | 4545048  |   | 67709526 | 6915826 | b | 36665733 | 6044448  | b | 17965148 | 2313670  | a | 36001178  | 5710761  | b | 12202000  | 2179337  |
| Lys*                  |   | 131211   | 19241    |   | 141613   | 27276   |   | 90210    | 13616    | b | 275484   | 38350    | b | 417734    | 107677   | a | 1035248   | 234998   |
| Ser'                  |   | 785529   | 80318    |   | 929142   | 105947  |   | 791490   | 70647    |   | 4293177  | 401154   |   | 5025670   | 727034   |   | 3961545   | 372318   |
| Thre*                 | b | 2068043  | 204216   | a | 3047090  | 310046  | b | 2030601  | 220855   |   | 7733206  | 918192   |   | 8419861   | 1058416  |   | 6605402   | 693997   |
| Try*                  | b | 5486162  | 639358   | a | 8524122  | 892114  | b | 4320799  | 644273   |   | 2774418  | 501953   |   | 3583317   | 453726   |   | 2758049   | 418088   |
| Val*                  |   | 24273700 | 1537281  |   | 32609468 | 3100677 |   | 27698003 | 3174191  | b | 29828716 | 3186436  |   | 33198703  | 3466738  | a | 40613251  | 2808314  |
| Gly-Ala'              | a | 0.199    | 0.01     | a | 0.203    | 0.007   | b | 0.158    | 0.011    |   | 0.11     | 0.008    |   | 0.125     | 0.008    |   | 0.131     | 0.006    |
| GABA'                 | a | 0.759    | 0.062    | a | 0.747    | 0.057   | b | 0.492    | 0.037    | c | 0.353    | 0.017    | b | 0.427     | 0.025    | a | 0.504     | 0.019    |
| Glu.acid*             | a | 21808054 | 1897866  | a | 23676374 | 1921045 | b | 14994892 | 1048022  |   | 64788771 | 4772637  |   | 59912939  | 4471082  |   | 52193343  | 4819893  |
| Asp.acid*             |   | 1129440  | 200119   |   | 1936470  | 351597  |   | 1535936  | 220488   |   | 17938970 | 2082607  |   | 14221743  | 1076180  |   | 16040309  | 891575   |
| Choline'              |   | 7.83     | 0.49     |   | 9.35     | 0.61    |   | 8.16     | 0.68     |   | 3.8      | 0.37     | b | 3.27      | 0.22     | a | 4.35      | 0.3      |
| GB                    |   | 0.907    | 0.054    | a | 1.084    | 0.059   | b | 0.734    | 0.052    | b | 0.318    | 0.022    |   | 0.399     | 0.03     | a | 0.504     | 0.046    |
| Lac*                  |   | 6637595  | 591856   |   | 7098668  | 527072  |   | 7779932  | 844853   |   | 7941343  | 938751   |   | 5889707   | 829818   |   | 9895397   | 1872333  |
| a-KC'                 | a | 1565783  | 117364   | a | 1791253  | 124417  | b | 1143422  | 113513   |   | 2966940  | 442705   |   | 3764830   | 870194   |   | 2551672   | 245893   |
| Cit*                  | a | 92001646 | 10019000 |   | 83542015 | 9145508 | b | 61973434 | 4065758  |   | 41996120 | 5031539  |   | 44731372  | 3831240  |   | 39969568  | 3436905  |
| Van.acd*              |   | 1737     | 268      |   | 1864     | 314     |   | 1266     | 187      |   | 917      | 159      |   | 790       | 108      |   | 628       | 77       |
| Asco*                 |   | 56956    | 14063    |   | 58186    | 11415   |   | 89912    | 29224    |   | 174493   | 38326    |   | 273205    | 96089    |   | 169665    | 25339    |

|           |   |           |          |   |           |          |   |           |          |   |          |          |   |          |          |   |          |         |
|-----------|---|-----------|----------|---|-----------|----------|---|-----------|----------|---|----------|----------|---|----------|----------|---|----------|---------|
| Caff*     |   | 10790     | 1874     |   | 22119     | 6735     |   | 23486     | 8275     | b | 11598    | 3454     | a | 16689    | 4526     | c | 885      | 261     |
| Ind.acec* | b | 43032576  | 6367473  | a | 67643600  | 5696306  |   | 48976871  | 6486290  |   | 3439473  | 495944   |   | 3532470  | 602628   |   | 3034866  | 422087  |
| JA*       |   | 10910675  | 1951833  | a | 16412422  | 2885960  | b | 8700608   | 1317939  |   | 4782235  | 611246   |   | 7446061  | 2640943  |   | 3569465  | 293017  |
| Mal*      |   | 190709326 | 29670216 |   | 177125319 | 18340574 |   | 211930962 | 24454532 |   | 78163195 | 12979715 |   | 72114357 | 16195782 |   | 86428386 | 9549319 |
| Pyr*      |   | 2359349   | 334812   |   | 4022579   | 559864   |   | 2613284   | 607448   |   | 1339989  | 232209   |   | 2134153  | 497300   |   | 3675881  | 1331409 |
| Tar*      |   | 32663     | 5282     |   | 42507     | 8232     |   | 40110     | 9707     |   | 131923   | 35091    |   | 143984   | 36170    |   | 115135   | 33445   |
| CGA*      | a | 4831126   | 1284514  |   | 3697966   | 805367   | b | 1358873   | 560226   | b | 515882   | 227356   | a | 17320256 | 7327665  | b | 1324616  | 352035  |
| QA*       | a | 8165325   | 1059335  | a | 9197088   | 1186386  | b | 4379642   | 862134   | c | 1057451  | 65786    | b | 1387962  | 92803    | a | 1784458  | 116579  |
| SA'       | a | 0.207     | 0.015    | a | 0.203     | 0.013    | b | 0.152     | 0.01     |   | 0.091    | 0.004    |   | 0.101    | 0.006    |   | 0.102    | 0.003   |
| Cin acid* |   | 3538      | 467      |   | 17218     | 7399     |   | 15715     | 11436    | a | 1714     | 249      |   | 2371     | 308      | b | 1321     | 212     |
| Xyli*     |   | 1065071   | 354148   |   | 1113782   | 96582    |   | 1341665   | 203137   |   | 4221165  | 600699   | b | 2495916  | 457985   | a | 6332025  | 1279856 |
| Man*      |   | 1835782   | 317562   | a | 3558336   | 908765   | b | 1331148   | 273889   |   | 19603927 | 2397185  |   | 16655623 | 1899713  |   | 17254123 | 1947221 |
| Disac'    |   | 4027070   | 865106   |   | 4168078   | 814218   |   | 3381009   | 531249   |   | 7806540  | 1443939  |   | 8159888  | 1052520  |   | 12605883 | 1912680 |
| Hexose*   |   | 29492615  | 3455187  |   | 35190387  | 1899620  |   | 32299843  | 3284412  |   | 39623704 | 4984250  |   | 43734635 | 2870173  |   | 56193469 | 6190221 |
| Uridine*  | a | 429201    | 37790    | a | 450116    | 33454    | b | 185182    | 14931    |   | 59994    | 3959     |   | 75292    | 7183     |   | 67190    | 2878    |
| Thymine'  |   | 5796447   | 790005   |   | 6326350   | 351554   |   | 4478895   | 560075   |   | 1214471  | 194493   |   | 938387   | 109901   |   | 1307293  | 188828  |
| Uracil*   | a | 1030178   | 117069   | a | 1062511   | 118805   | b | 256070    | 80170    |   | 15078    | 3229     |   | 31224    | 11238    |   | 14235    | 2876    |
| Adenine*  |   | 5508279   | 644403   |   | 5614837   | 711400   |   | 5225279   | 638711   |   | 1408810  | 218628   |   | 1892194  | 380503   |   | 1801907  | 163667  |
| Phenol'   | a | 0.138     | 0.012    | a | 0.133     | 0.006    | b | 0.08      | 0.007    |   | 0.067    | 0.008    |   | 0.065    | 0.006    |   | 0.073    | 0.006   |
| Galangi*  |   | 863787    | 205277   |   | 887013    | 178038   |   | 1292993   | 367792   |   | 5317     | 2546     |   | 5454     | 1573     |   | 2915     | 715     |
| Kaemp*    | b | 54987     | 14544    | a | 130813    | 24136    | b | 16281     | 4717     |   | 852      | 230      |   | 926      | 216      |   | 617      | 119     |
| Limone*   |   | 5539      | 1388     |   | 6771      | 1200     |   | 8864      | 3925     |   | 2590     | 454      |   | 3408     | 539      |   | 4019     | 669     |
| Ocimen*   |   | 8268      | 1108     | b | 7158      | 1148     | a | 20533     | 6438     | b | 3966     | 615      | b | 4255     | 619      | a | 9075     | 1943    |
| Quer*     |   | 402226    | 135019   |   | 2349354   | 1195583  |   | 499982    | 272556   | a | 92660    | 34970    |   | 62215    | 17676    | b | 679      | 175     |
| Resv*     |   | 3735      | 438      |   | 4476      | 720      |   | 2849      | 297      |   | 2610     | 386      |   | 4036     | 579      |   | 4492     | 689     |
| Sabinen*  |   | 6549      | 1129     | b | 5143      | 543      | a | 8893      | 1255     |   | 2656     | 424      |   | 4328     | 574      |   | 3327     | 468     |
| a-terpin* |   | 2344      | 446      |   | 2870      | 468      |   | 2949      | 584      |   | 1635     | 156      |   | 1837     | 267      |   | 2342     | 279     |
| Cate*     | b | 449326    | 131928   | a | 1569190   | 449178   | b | 315960    | 84230    |   | 317752   | 60952    |   | 445608   | 85442    |   | 346511   | 41391   |
| Acace*    |   | 116075751 | 28725029 |   | 107641048 | 17765723 |   | 162651406 | 28916030 | b | 1536487  | 772233   | a | 6327770  | 2252286  | b | 343892   | 177908  |
| Ca        |   | 0.486     | 0.024    |   | 0.48      | 0.035    |   | 0.409     | 0.03     |   | 0.322    | 0.02     |   | 0.342    | 0.02     |   | 0.328    | 0.015   |
| K         | a | 2.337     | 0.117    | a | 2.183     | 0.134    | b | 1.706     | 0.108    |   | 0.622    | 0.03     |   | 0.671    | 0.028    |   | 0.613    | 0.027   |
| Mg        | a | 0.181     | 0.013    |   | 0.172     | 0.013    | b | 0.135     | 0.01     |   | 0.18     | 0.011    |   | 0.185    | 0.008    |   | 0.182    | 0.01    |
| S         | a | 0.232     | 0.014    | a | 0.203     | 0.018    | b | 0.146     | 0.01     |   | 0.112    | 0.004    |   | 0.108    | 0.002    |   | 0.11     | 0.003   |
| P         | a | 0.238     | 0.017    | a | 0.226     | 0.016    | b | 0.149     | 0.013    |   | 0.108    | 0.005    |   | 0.115    | 0.005    |   | 0.112    | 0.005   |

|     |   |        |       |   |        |       |   |        |       |   |        |       |  |        |       |   |        |       |
|-----|---|--------|-------|---|--------|-------|---|--------|-------|---|--------|-------|--|--------|-------|---|--------|-------|
| Fe  |   | 0.406  | 0.086 |   | 0.466  | 0.129 |   | 0.241  | 0.031 |   | 6.612  | 0.618 |  | 6.595  | 0.44  |   | 6.744  | 0.462 |
| Mn  |   | 0.754  | 0.049 |   | 0.91   | 0.078 |   | 0.794  | 0.03  |   | 0.577  | 0.055 |  | 0.493  | 0.027 |   | 0.481  | 0.022 |
| Na  |   | 0.122  | 0.017 |   | 0.118  | 0.014 |   | 0.509  | 0.216 | a | 0.317  | 0.036 |  | 0.274  | 0.047 | b | 0.185  | 0.017 |
| C   | b | 43.9   | 0.3   | b | 44.2   | 0.2   | a | 44.3   | 0.3   |   | 36.2   | 0.9   |  | 35.6   | 0.7   |   | 35.3   | 0.9   |
| N   |   | 1.336  | 0.106 |   | 1.196  | 0.066 |   | 0.826  | 0.075 |   | 0.877  | 0.036 |  | 0.901  | 0.025 |   | 0.915  | 0.023 |
| C/N | b | 36.1   | 3.2   | b | 38.8   | 2.5   | a | 59     | 4.8   |   | 41.9   | 1.3   |  | 39.9   | 1.3   |   | 38.9   | 1.5   |
| C/P | b | 196    | 12    | b | 208    | 14    | a | 334    | 35    |   | 341    | 12    |  | 317    | 12    |   | 326    | 19    |
| N/P |   | 5.636  | 0.277 |   | 5.384  | 0.204 |   | 5.698  | 0.338 |   | 8.186  | 0.259 |  | 7.975  | 0.255 |   | 8.339  | 0.259 |
| C/K | b | 19.422 | 0.928 | b | 21.208 | 1.201 | a | 27.435 | 1.863 |   | 60.952 | 4.131 |  | 54.164 | 2.235 |   | 59.491 | 3.646 |
| N/K |   | 0.566  | 0.028 |   | 0.554  | 0.021 |   | 0.485  | 0.03  |   | 1.481  | 0.119 |  | 1.362  | 0.047 |   | 1.519  | 0.056 |
| P/K |   | 0.101  | 0.004 |   | 0.105  | 0.006 |   | 0.089  | 0.007 |   | 0.18   | 0.012 |  | 0.172  | 0.007 |   | 0.184  | 0.008 |

326

327

328 Table S4

| July                        |   |          |         |   |          |         |   |          |         |   |          |         |   |          |          |   |          |          |
|-----------------------------|---|----------|---------|---|----------|---------|---|----------|---------|---|----------|---------|---|----------|----------|---|----------|----------|
| <i>Alopecurus pratensis</i> |   |          |         |   |          |         |   |          |         |   |          |         |   |          |          |   |          |          |
| Shoots                      |   |          |         |   |          |         |   |          | Roots   |   |          |         |   |          |          |   |          |          |
| Variable                    |   | IC       | SE      |   | AC       | SE      |   | D        | SE      |   | IC       | SE      |   | AC       | SE       |   | D        | SE       |
| Ala*                        | b | 51635    | 12640   | a | 128123   | 24377   | b | 38207    | 6454    |   | 47506934 | 5533246 |   | 54907767 | 7857571  |   | 65384078 | 10212216 |
| Arg*                        |   | 362608   | 109951  | a | 456832   | 70043   | b | 143192   | 26607   |   | 205589   | 55456   |   | 385575   | 139868   |   | 228029   | 73860    |
| Iso*                        |   | 1055640  | 745955  |   | 264010   | 170271  |   | 27201    | 5884    |   | 47907288 | 9169421 |   | 54297938 | 9481451  |   | 34678224 | 4102843  |
| Asp*                        |   | 1481707  | 446173  | a | 2561565  | 470865  | b | 733572   | 152840  |   | 67710745 | 7248534 |   | 83464392 | 12732040 |   | 85491660 | 7177970  |
| Glu*                        |   | 85179    | 22675   |   | 79121    | 11239   |   | 46849    | 10065   | a | 118062   | 21762   |   | 180528   | 46320    | b | 62067    | 12450    |
| Gly*                        | b | 21879    | 6102    | a | 81506    | 16944   | b | 7090     | 916     |   | 2476781  | 604094  |   | 3098673  | 673351   |   | 2334828  | 845540   |
| Hist*                       | a | 14597074 | 3750617 |   | 11931423 | 1465539 | b | 5134975  | 1059096 |   | 1965845  | 441330  |   | 4641255  | 1651614  |   | 1875856  | 351320   |
| Phe*                        |   | 2601191  | 1398910 |   | 2591926  | 404298  |   | 2239842  | 601960  | b | 7374237  | 1259233 | b | 12691315 | 2217578  | a | 44541268 | 8600652  |
| Pro*                        |   | 25017073 | 3908106 | a | 31074315 | 4965113 | b | 14466561 | 3254798 | a | 16181970 | 2959552 |   | 29588202 | 7149487  | b | 13052201 | 2793730  |
| Leu*                        |   | 33448    | 8335    |   | 63731    | 10650   |   | 31181    | 6981    |   | 660054   | 152481  |   | 1241837  | 387719   |   | 1129335  | 324085   |

|           |   |           |          |   |           |          |   |           |          |   |          |         |   |          |          |   |          |         |
|-----------|---|-----------|----------|---|-----------|----------|---|-----------|----------|---|----------|---------|---|----------|----------|---|----------|---------|
| Lys*      |   | 607529    | 98579    | b | 545099    | 64518    | a | 1786224   | 719912   |   | 4291613  | 548091  |   | 4550761  | 862643   |   | 3068763  | 494277  |
| Ser'      |   | 1200606   | 188810   |   | 1395962   | 160828   |   | 1311212   | 308362   |   | 8353480  | 981111  | b | 10069047 | 1649752  | b | 5807935  | 771545  |
| Thre*     |   | 3220744   | 659137   |   | 3324427   | 434396   |   | 1647376   | 372895   | b | 2493402  | 343951  |   | 4612905  | 750738   | a | 5141734  | 874697  |
| Try*      |   | 11204410  | 1650204  |   | 16480336  | 3607708  |   | 7315032   | 1278450  |   | 24294521 | 2468845 |   | 26309239 | 2604252  |   | 23269818 | 2347528 |
| Val*      |   | 0.321     | 0.023    |   | 0.304     | 0.018    |   | 0.241     | 0.025    |   | 0.127    | 0.012   |   | 0.171    | 0.029    |   | 0.178    | 0.019   |
| Gly-Ala'  |   | 0.313     | 0.016    |   | 0.269     | 0.011    |   | 0.263     | 0.019    |   | 0.403    | 0.032   |   | 0.4      | 0.034    |   | 0.383    | 0.013   |
| GABA'     | a | 31000875  | 4666754  | b | 19890800  | 1803059  | b | 15649731  | 1951109  | a | 40335500 | 3751264 | a | 40882961 | 4726560  | b | 28546667 | 2360199 |
| Glu.acid* |   | 264579    | 153261   |   | 23857     | 7065     |   | 262353    | 135251   | a | 2347     | 351     | b | 1037     | 165      |   | 1665     | 364     |
| Asp.acid* |   | 4656264   | 1417059  |   | 3414415   | 1261035  |   | 7647212   | 2524103  | b | 12911    | 4880    | b | 107111   | 19561    | a | 7005803  | 3312999 |
| Choline'  |   | 0.71      | 0.046    |   | 0.841     | 0.09     |   | 0.568     | 0.073    | b | 0.263    | 0.031   |   | 0.349    | 0.064    | a | 0.423    | 0.04    |
| GB        |   | 7797228   | 648499   |   | 7491770   | 779509   |   | 5933102   | 756801   |   | 6198626  | 361313  | a | 7360650  | 700348   | b | 5502606  | 443446  |
| Lac*      |   | 8161540   | 1135337  |   | 6266173   | 1060876  |   | 5142950   | 720052   |   | 2439777  | 477057  |   | 1720260  | 244375   |   | 2021989  | 229832  |
| a-KC'     | a | 207394614 | 15884979 | b | 152313932 | 13973238 | b | 151416246 | 11457041 | b | 31158028 | 3447209 | a | 54508357 | 6258352  | a | 48292221 | 4446748 |
| Cit*      | a | 1.207     | 0.066    |   | 1.094     | 0.073    | b | 0.872     | 0.088    |   | 0.37     | 0.035   |   | 0.48     | 0.078    |   | 0.53     | 0.052   |
| Van.acd*  |   | 914446    | 192157   | a | 1204315   | 202176   | b | 332623    | 81684    |   | 8563008  | 740407  |   | 11289242 | 1014315  |   | 9623591  | 827557  |
| Asco*     | a | 9112347   | 3127518  |   | 5371990   | 851634   | b | 4584      | 943      | b | 0        | 0       | a | 1400     | 614      | b | 0        | 0       |
| Caff*     |   | 91181     | 25570    |   | 8262193   | 5122108  |   | 130810    | 11709    |   | 1317     | 498     |   | 7731360  | 5679124  |   | 1143463  | 432188  |
| Ind.acec* |   | 27997334  | 3287789  |   | 26293370  | 2055700  |   | 32682448  | 2830901  | b | 1197198  | 452498  | a | 8327670  | 2616305  | b | 1538413  | 488467  |
| JA*       |   | 277627203 | 33518594 |   | 388614365 | 38035978 |   | 418723224 | 80507256 | b | 9131236  | 3451283 | a | 70758121 | 14273455 | b | 16426295 | 6208556 |
| Mal*      | b | 2736710   | 380794   | a | 6241151   | 926704   | b | 2594752   | 441261   | a | 32272625 | 9002369 | b | 984109   | 147761   |   | 14342592 | 6793949 |
| Pyr*      | b | 60264     | 12980    |   | 91021     | 16431    | a | 130153    | 20891    | b | 115300   | 43579   | b | 859614   | 352831   | a | 4992432  | 1880652 |
| Tar*      |   | 6.709     | 0.556    |   | 7.493     | 1.132    |   | 6.201     | 1.197    |   | 2.549    | 0.417   |   | 2.683    | 0.452    |   | 3.358    | 0.456   |
| CGA*      |   | 6061276   | 536591   |   | 7313070   | 808693   |   | 6650127   | 1337627  | b | 1095909  | 123789  |   | 1393696  | 215968   | a | 1706388  | 181585  |
| QA*       |   | 0.366     | 0.019    |   | 0.347     | 0.022    |   | 0.315     | 0.029    |   | 0.141    | 0.03    |   | 0.104    | 0.011    |   | 0.096    | 0.007   |
| SA'       |   | 5557      | 2124     |   | 55625     | 29709    |   | 19732     | 6515     |   | 1262     | 242     | b | 521      | 135      | a | 1831     | 517     |
| Cin acid* | a | 65274595  | 12211132 | b | 8228695   | 3153148  | b | 29794348  | 4536558  | b | 178      | 67      | a | 2121     | 687      | b | 124      | 47      |
| Uridine*  | a | 8696343   | 1091675  | a | 5890591   | 741746   | b | 2780520   | 801231   | b | 933091   | 100149  | a | 1671232  | 347553   | b | 909674   | 93448   |
| Thymine'  |   | 176895    | 38617    |   | 197875    | 31653    |   | 195630    | 29658    |   | 12843    | 2449    |   | 17192    | 5407     |   | 7044     | 1062    |
| Uracil*   |   | 7653031   | 752790   |   | 9680047   | 734166   |   | 10313898  | 1428797  | b | 305744   | 99410   | a | 969647   | 180175   | a | 1235014  | 228098  |
| Adenine*  |   | 621017    | 98997    |   | 1208466   | 200357   |   | 824959    | 150797   | a | 5299801  | 1712125 | b | 1216981  | 326867   | b | 1557723  | 574427  |
| Xyli*     |   | 2010061   | 331622   | a | 4066522   | 936892   | b | 535244    | 61512    |   | 9638055  | 1959177 |   | 14873802 | 3170440  |   | 16454037 | 2654546 |
| Man*      |   | 5004646   | 1674833  |   | 7534803   | 859393   |   | 5651628   | 1024360  |   | 10706807 | 2252765 |   | 12048305 | 987812   |   | 16180379 | 1225328 |
| Disac'    |   | 32525182  | 4500576  |   | 44631314  | 4871896  |   | 41543553  | 7710279  |   | 53670161 | 7299241 |   | 37118930 | 3210113  |   | 52514479 | 5846080 |
| Hexose*   |   | 7109155   | 1050486  |   | 6634441   | 808963   |   | 5234967   | 917393   | b | 4246651  | 424803  |   | 3100053  | 589024   | a | 5165177  | 666248  |

| Phenol'   | a | 304952387 | 26406629 | b | 118323205 | 14622706 | b | 80049018 | 11875291 | a | 24430696 | 4182682 | b | 11191593 | 1362627 | b | 14034454 | 1585868 |
|-----------|---|-----------|----------|---|-----------|----------|---|----------|----------|---|----------|---------|---|----------|---------|---|----------|---------|
| Galangi*  |   | 2325      | 529      |   | 1945      | 441      |   | 2116     | 458      | b | 1172     | 148     | b | 1318     | 182     | a | 2585     | 409     |
| Kaemp*    | a | 6638      | 918      | a | 6934      | 1245     | b | 51288    | 17824    | b | 2562     | 331     | b | 2536     | 320     | a | 4720     | 941     |
| Limone*   | b | 17973     | 3997     | b | 10869     | 1569     | a | 191118   | 93359    | b | 4020     | 522     | b | 4006     | 512     | a | 6915     | 863     |
| Ocimen*   | b | 460611    | 216894   | b | 365227    | 123099   | a | 11890732 | 1292867  | b | 109      | 41      | a | 568553   | 249327  | b | 72       | 17      |
| Quer*     |   | 4348      | 817      |   | 4003      | 540      |   | 3698     | 657      | b | 2687     | 312     | b | 2474     | 405     | a | 4295     | 656     |
| Resv*     | b | 7562      | 1396     | b | 4405      | 766      | a | 70119    | 19672    |   | 2517     | 536     | b | 1336     | 195     | a | 3176     | 673     |
| Sabinen*  | b | 3626      | 492      | b | 2483      | 415      | a | 26183    | 7309     |   | 1687     | 237     |   | 2217     | 254     |   | 2473     | 409     |
| a-terpin* |   | 287685    | 59287    |   | 708829    | 164559   |   | 433064   | 58766    | b | 30551    | 18468   | a | 2058039  | 433031  | b | 124880   | 37289   |
| Cate*     | b | 264916    | 134314   | b | 729108    | 298574   | a | 7411733  | 2906107  |   | 18129    | 9875    |   | 1214     | 280     |   | 1210     | 340     |
| Acace*    | a | 644894    | 48506    |   | 546637    | 48679    | b | 432228   | 60203    |   | 51823    | 5195    |   | 68676    | 9268    |   | 51269    | 5039    |
| Ca        |   | 1.886     | 0.043    |   | 1.793     | 0.042    |   | 1.904    | 0.065    |   | 0.599    | 0.028   |   | 0.606    | 0.03    |   | 0.633    | 0.024   |
| K         | a | 0.165     | 0.012    | b | 0.118     | 0.008    | b | 0.106    | 0.011    |   | 0.19     | 0.011   |   | 0.184    | 0.012   |   | 0.186    | 0.012   |
| Mg        | a | 0.129     | 0.01     |   | 0.122     | 0.006    | b | 0.102    | 0.005    |   | 0.122    | 0.003   |   | 0.122    | 0.004   |   | 0.131    | 0.003   |
| S         | a | 0.151     | 0.005    |   | 0.136     | 0.007    | b | 0.122    | 0.011    |   | 0.091    | 0.003   |   | 0.098    | 0.004   |   | 0.096    | 0.003   |
| P         |   | 0.192     | 0.03     |   | 0.211     | 0.028    |   | 0.14     | 0.014    |   | 7.015    | 0.471   |   | 6.607    | 0.372   |   | 6.357    | 0.528   |
| Fe        |   | 0.292     | 0.021    |   | 0.339     | 0.028    |   | 0.302    | 0.02     |   | 0.429    | 0.029   |   | 0.402    | 0.028   |   | 0.456    | 0.032   |
| Mn        |   | 0.1       | 0        |   | 0.116     | 0.016    |   | 0.1      | 0        |   | 0.239    | 0.023   |   | 0.216    | 0.022   |   | 0.176    | 0.017   |
| Na        |   | 44.7      | 0.2      |   | 45        | 0.2      |   | 44.7     | 0.3      |   | 35       | 0.8     |   | 35.5     | 0.6     |   | 34.4     | 0.6     |
| C         | a | 1.34      | 0.03     | a | 1.23      | 0.03     | b | 1.07     | 0.04     |   | 1.05     | 0.03    |   | 1.11     | 0.06    |   | 1.05     | 0.03    |
| N         | b | 33.4      | 0.8      | b | 36.9      | 0.9      | a | 42.5     | 1.7      |   | 33.6     | 1       |   | 32.6     | 1.4     |   | 33       | 1.1     |
| C/N       | b | 299       | 10       |   | 340       | 15       | a | 393      | 35       |   | 390      | 12      |   | 367      | 17      |   | 362      | 13      |
| C/P       |   | 8.972     | 0.295    |   | 9.256     | 0.396    |   | 9.245    | 0.714    |   | 11.662   | 0.25    |   | 11.406   | 0.563   |   | 11.108   | 0.479   |
| N/P       |   | 23.82     | 0.59     |   | 25.294    | 0.589    |   | 23.719   | 0.815    |   | 60.828   | 3.859   |   | 60.404   | 3.186   |   | 55.678   | 2.701   |
| C/K       | a | 0.715     | 0.019    | a | 0.688     | 0.016    | b | 0.562    | 0.016    |   | 1.82     | 0.117   |   | 1.871    | 0.097   |   | 1.716    | 0.113   |
| N/K       |   | 0.081     | 0.003    |   | 0.077     | 0.004    |   | 0.065    | 0.006    |   | 0.156    | 0.009   |   | 0.165    | 0.007   |   | 0.156    | 0.009   |
| P/K       |   | 0.224     | 0.013    |   | 0.228     | 0.013    |   | 0.186    | 0.016    |   | 0.089    | 0.01    |   | 0.104    | 0.012   |   | 0.085    | 0.011   |
